# Supplementary material for: Unveiling productivity: The interplay of cognitive arousal and expressive typing in remote work
Source: PubMed Central journal article supplement (PMC11095729; doi:10.1371/journal.pone.0300786), 2024-05-15
Supplement: pone.0300786.s001.pdf [file pone.0300786.s001.pdf]

**Summary Derivation of E-Step Updates:** To derive the filter step equations, we approximate the posterior density as a Gaussian distribution. Therefore, we have

$$\begin{aligned}
& e^{-\frac{1}{2}(\mathbf{x}_k - \mathbf{x}_{k|k})^T \mathbf{W}_{k|k}^{-1} (\mathbf{x}_k - \mathbf{x}_{k|k})} \\
& \propto e^{n_{k,1} \log p_{k,1} + (1-n_{k,1}) \log(1-p_{k,1})} \\
& \times e^{n_{k,2} \log p_{k,2} + (1-n_{k,2}) \log(1-p_{k,2})} \\
& \times e^{-\frac{(r_k - \gamma_0 - \gamma_1 x_{k,1} - \gamma_2 x_{k,2})^2}{2\sigma_v^2}} \\
& \times e^{-\frac{1}{2}(\mathbf{x}_k - \mathbf{x}_{k|k-1})^T \mathbf{W}_{k|k-1}^{-1} (\mathbf{x}_k - \mathbf{x}_{k|k-1})}. \tag{1}
\end{aligned}$$

Now taking the logarithm of Eq (1) and ignoring the constant of proportionality, we obtain

$$\begin{aligned}
& -\frac{1}{2}(\mathbf{x}_k - \mathbf{x}_{k|k})^T \mathbf{W}_{k|k}^{-1} (\mathbf{x}_k - \mathbf{x}_{k|k}) \\
& = n_{k,1} \log p_{k,1} + (1-n_{k,1}) \log(1-p_{k,1}) \\
& + n_{k,2} \log p_{k,2} + (1-n_{k,2}) \log(1-p_{k,2}) \\
& - \frac{(r_k - \gamma_0 - \gamma_1 x_{1,k} - \gamma_2 x_{2,k})^2}{2\sigma_v^2} \\
& - \frac{1}{2}(\mathbf{x}_k - \mathbf{x}_{k|k-1})^T \mathbf{W}_{k|k-1}^{-1} (\mathbf{x}_k - \mathbf{x}_{k|k-1}) + \log C, \tag{2}
\end{aligned}$$

where  $C$  is the constant of proportionality. Eq (2) simplifies to

$$\begin{aligned}
& -\frac{1}{2}(\mathbf{x}_k - \mathbf{x}_{k|k})^T \mathbf{W}_{k|k}^{-1} (\mathbf{x}_k - \mathbf{x}_{k|k}) \\
& = f(\mathbf{x}_k) - \frac{1}{2}(\mathbf{x}_k - \mathbf{x}_{k|k-1})^T \mathbf{W}_{k|k-1}^{-1} (\mathbf{x}_k - \mathbf{x}_{k|k-1}), \tag{3}
\end{aligned}$$

where

$$\begin{aligned}
f(\mathbf{x}_k) & = n_{k,1} \log p_{k,1} + (1-n_{k,1}) \log(1-p_{k,1}) \\
& + n_{k,2} \log(p_{k,2}) + (1-n_{k,2}) \log(1-p_{k,2}) \\
& - \frac{(r_k - \gamma_0 - \gamma_1 x_{1,k} - \gamma_2 x_{2,k})^2}{2\sigma_v^2} + \log C. \tag{4}
\end{aligned}$$

We follow previous methods to estimate our  $\mathbf{x}_{k|k}$  and  $\mathbf{W}_{k|k}$ . Here, differentiating Eq (3) we get,

$$\mathbf{W}_{k|k}^{-1}(\mathbf{x}_k - \mathbf{x}_{k|k}) = \mathbf{W}_{k|k-1}^{-1}(\mathbf{x}_k - \mathbf{x}_{k|k-1}) - \frac{\partial f(\mathbf{x}_k)}{\partial \mathbf{x}_k}. \tag{5}$$

From Eq (5), we can obtain  $\mathbf{x}_{k|k}$  by setting  $\mathbf{x}_k = \mathbf{x}_{k|k}$  which makes the *RHS* equal to 0. Then solving we get,

$$\mathbf{x}_{k|k} = \mathbf{x}_{k|k-1} + \mathbf{W}_{k|k-1} \frac{\partial f(\mathbf{x}_k)}{\partial \mathbf{x}_k} \Big|_{\mathbf{x}_{k|k}}, \tag{6}$$

where

$$\frac{\partial f(\mathbf{x}_k)}{\partial \mathbf{x}_k} = \begin{bmatrix} n_{k,1} - p_{k,1} - \frac{\gamma_1(r_k - \gamma_0 - \gamma_1 x_{1,k} - \gamma_2 x_{2,k})}{\sigma_v^2} \\ n_{k,2} - p_{k,2} - \frac{\gamma_2(r_k - \gamma_0 - \gamma_1 x_{1,k} - \gamma_2 x_{2,k})}{\sigma_v^2} \end{bmatrix}. \tag{7}$$

Equation (6) can be solved using the Newton-Rapshon method. Differentiating (6) again we have the update for  $\mathbf{W}_{k|k}$  as

$$\mathbf{W}_{k|k} = \left( \mathbf{W}_{k|k-1}^{-1} - \frac{\partial^2 f(\mathbf{x}_k)}{\partial \mathbf{x}_k^2} \Big|_{\mathbf{x}_{k|k}} \right)^{-1}, \quad (8)$$

where

$$\frac{\partial^2 f(\mathbf{x}_k)}{\partial \mathbf{x}_k^2} = \begin{bmatrix} -p_{k,1}(1-p_{k,1}) - \frac{\gamma_1^2}{\sigma_v^2} & \frac{\gamma_1 \gamma_2}{\sigma_v^2} \\ \frac{\gamma_1 \gamma_2}{\sigma_v^2} & -p_{k,2}(1-p_{k,2}) - \frac{\gamma_2^2}{\sigma_v^2} \end{bmatrix}. \quad (9)$$

After proceeding in the forward direction, we obtain a smoother estimate in the backward direction, thereby making use of all the observations to determine improved state space estimates at each point. The backward smoother equations are:

$$\mathbf{A}_k = \mathbf{W}_{k|k} \mathbf{W}_{k+1|k}^{-1} \quad (10)$$

$$\mathbf{x}_{k|K} = \mathbf{x}_{k|k} + \mathbf{A}_k (\mathbf{x}_{k+1|K} - \mathbf{x}_{k+1|k}) \quad (11)$$

$$\mathbf{W}_{k|K} = \mathbf{W}_{k|k} + \mathbf{A}_k^2 (\mathbf{W}_{k+1|K} - \mathbf{W}_{k+1|k}). \quad (12)$$

**Summary Derivation of M-step derivations** Letting  $\mathbf{X}^K = \{x_1, x_2, \dots, x_K\}$  and considering that the latent variables are independent random variables, the complete data likelihood conditioned on the model parameters  $\Theta$  is given by,

$$\begin{aligned} P(\mathbf{Y}^K, \mathbf{X}^K | \Theta) &= \prod_{k=1}^K p_{k,1}^{n_{k,1}} (1-p_{k,1})^{1-n_{k,1}} \\ &\times \prod_{k=1}^K p_{k,2}^{m_k} (1-p_{k,2})^{1-n_{k,2}} \\ &\times \prod_{k=1}^J \frac{1}{\sqrt{2\pi\sigma_v^2}} e^{-\frac{(\tau_k - \gamma_0 - \gamma_1 x_{k,1} - \gamma_2 x_{k,2})^2}{2\sigma_v^2}} \\ &\times \prod_{k=1}^J \frac{1}{\sqrt{2\pi\sigma_{e_1}\sigma_{e_2}}} e^{-\frac{1}{2} \left( \left( \frac{x_{k,1} - x_{k-1,1}}{\sigma_{e_1}} \right)^2 + \left( \frac{x_{k,2} - x_{k-1,2}}{\sigma_{e_2}} \right)^2 \right)}. \end{aligned} \quad (13)$$

The expected log-likelihood is

$$\begin{aligned}
Q &= \sum_{k=1}^J \mathbb{E} [n_{k,1}(\beta_1 + x_{k,1}) - \log(1 + e^{\beta_1 + x_{k,1}})] \\
&+ \sum_{k=1}^J \mathbb{E} [m_k(\beta_2 + x_{k,2}) - \log(1 + e^{\beta_2 + x_{k,2}})] \\
&- \frac{K}{2} \log(2\pi\sigma_v^2) \\
&- \sum_{k=1}^J \frac{1}{2\sigma_v^2} \mathbb{E} [(r_k - \gamma_0 - \gamma_1 x_{k,1} - \gamma_2 x_{k,2})^2] \\
&- \frac{K}{2} \log(2\pi\sigma_{\epsilon,1}\sigma_{\epsilon,2}) - \\
&\sum_{k=1}^J \frac{\mathbb{E} [(x_{k,1} - x_{k-1,1})^2]}{2\sigma_{\epsilon,1}^2} + \frac{\mathbb{E} [(x_{k,2} - x_{k-1,2})^2]}{2\sigma_{\epsilon,2}^2}. \tag{14}
\end{aligned}$$

**M-step Updates for  $\gamma_0$ ,  $\gamma_1$ , and  $\gamma_2$**

Assuming  $x_{k|K,1}$  and  $x_{k|K,2}$  are independent with zero co-variance and the variance of  $x_{k|K,1}$  and  $x_{k|K,2}$  obtained from  $\mathbf{W}_{k|K}$  is given by  $\sigma_{k|K,1}^2$  and  $\sigma_{k|K,2}^2$  respectively, we define:

$$\mathbb{E}[x_{k|K,1}x_{k|K,2}] = x_{k|K,1}x_{k|K,2} \tag{15}$$

$$\mathbb{E}[x_{k|K,1}^2] = u_{k|K,1} = x_{k|K,1}^2 + \sigma_{k|K,1}^2 \tag{16}$$

$$\mathbb{E}[x_{k|K,2}^2] = u_{k|K,2} = x_{k|K,2}^2 + \sigma_{k|K,2}^2. \tag{17}$$

Therefore, taking the partial derivatives with respect to  $\gamma_0$ ,  $\gamma_1$  and  $\gamma_2$  and setting them to 0 yield

$$\begin{aligned}
\sum_{k=1}^K r_k - K\gamma_0 - \gamma_1 \sum_{k=1}^K x_{k|K,1} - \gamma_2 \sum_{k=1}^K x_{k|K,2} &= 0 \\
\sum_{k=1}^K r_k x_{k|K,1} - \gamma_0 \sum_{k=1}^K x_{k|K,1} - \gamma_1 \sum_{k=1}^K u_{k|K,1} & \\
&- \gamma_2 \sum_{k=1}^K x_{k|K,1}x_{k|K,2} = 0 \\
\sum_{k=1}^K r_k x_{k|K,2} - \gamma_0 \sum_{k=1}^K x_{k|K,2} - \gamma_1 \sum_{k=1}^K x_{k|K,1}x_{k|K,2} & \\
&- \gamma_2 \sum_{k=1}^K u_{k|K,2} = 0. \tag{18}
\end{aligned}$$

**M-step updates for  $\sigma_v$**  Taking the partial derivative with respect to

$\sigma_v^2$  and setting it to 0 yields

$$\begin{aligned} \sigma_v^2 = \frac{1}{K} \left\{ \sum_{k=1}^K r_k^2 + K\gamma_0^2 + \gamma_1^2 \sum_{k=1}^K u_{k|K,1} + \gamma_2^2 \sum_{k=1}^K u_{k|K,2} \right. \\ \left. - 2\gamma_0 \sum_{k=1}^K r_k - 2 \sum_{k=1}^K r_k x_{k|K,1} - 2 \sum_{k=1}^K r_k x_{k|K,2} \right. \\ \left. + 2\gamma_0 \sum_{k=1}^K x_{k|K,1} + 2\gamma_0 \sum_{k=1}^K x_{k|K,2} + \sum_{k=1}^K x_{k|K,1} x_{k|K,2} \right\}. \end{aligned} \quad (19)$$

**M-step updates for  $\sigma_{\epsilon,1}$  and  $\sigma_{\epsilon,2}$**

Let  $a_k$  be the diagonal elements of  $A_k$ . We define:

$$\begin{aligned} \mathbb{E}[x_{k|K,1} x_{k+1|K,1}] &= v_{k|K,1} \\ &= x_{k|K,1} x_{k+1|K,1} + a_{k,1} \sigma_{k|K,1}^2 \end{aligned} \quad (20)$$

$$\begin{aligned} \mathbb{E}[x_{k|K,2} x_{k+1|K,2}] &= v_{k|K,2} \\ &= x_{k|K,2} x_{k+1|K,2} + a_{k,2} \sigma_{k|K,2}^2. \end{aligned} \quad (21)$$

Taking the partial derivative with respect to  $\sigma_{\epsilon,1}^2$  and  $\sigma_{\epsilon,2}^2$  and setting it to 0 yields

$$\begin{aligned} \sigma_{\epsilon,1}^2 &= \frac{2}{K} \left\{ \sum_{k=1}^K u_{k|K,1} - 2 \sum_{k=1}^K v_{k|K,1} + \sum_{k=1}^K u_{k-1|K,1} \right\} \\ \sigma_{\epsilon,2}^2 &= \frac{2}{K} \left\{ \sum_{k=1}^K u_{k|K,2} - 2 \sum_{k=1}^K v_{k|K,2} + \sum_{k=1}^K u_{k-1|K,2} \right\}. \end{aligned} \quad (22)$$

**M-step Expected Log-Likelihood.** Letting  $\mathbf{X}^J = \{x_1, x_2, \dots, x_J\}$ , the complete data likelihood conditioned on the model parameters  $\Theta$  is given by,

$$\begin{aligned} P(\mathbf{Y}^J, \mathbf{X}^J | \Theta) &= \prod_{j=1}^J p_j^{n_j} (1-p_j)^{1-n_j} \times \prod_{j=1}^J q_j^{m_j} (1-q_j)^{1-q_j} \times \\ &\quad \prod_{j=1}^J \frac{1}{\sqrt{2\pi\sigma_v^2}} e^{-\frac{(r_j - \gamma_0 - \gamma_1 x_{j,1} - \gamma_2 x_{j,2})^2}{2\sigma_v^2}} \times \\ &\quad \prod_{j=1}^J \frac{1}{\sqrt{2\pi\sigma_{e_1}\sigma_{e_2}}} e^{-\frac{1}{2} \left( \left( \frac{x_{j,1} - x_{j-1,1}}{\sigma_{e_1}} \right)^2 + \left( \frac{x_{j,2} - x_{j-1,2}}{\sigma_{e_2}} \right)^2 \right)} \end{aligned} \quad (23)$$

The expected log-likelihood is

$$\begin{aligned}
Q &= \sum_{j=1}^J \mathbb{E} [n_j(\beta_1 + x_{j,1}) - \log(1 + e^{\beta_1 + x_{j,1}})] \\
&+ \sum_{j=1}^J \mathbb{E} [m_j(\beta_2 + x_{j,2}) - \log(1 + e^{\beta_2 + x_{j,2}})] \\
&- \frac{J}{2} \log(2\pi\sigma_v^2) - \sum_{j=1}^J \frac{1}{2\sigma_v^2} \mathbb{E} [(r_j - \gamma_0 - \gamma_1 x_{j,1} - \gamma_2 x_{j,2})^2] \\
&- \frac{J}{2} \log(2\pi\sigma_{\epsilon,1}\sigma_{\epsilon,2}) - \sum_{j=1}^J \frac{\mathbb{E}[x_{j,1} - x_{j-1,1}]^2}{2\sigma_{\epsilon,1}^2} + \frac{\mathbb{E}[x_{j,2} - x_{j-1,2}]^2}{2\sigma_{\epsilon,2}^2}
\end{aligned} \tag{24}$$

**M-step Updates for  $\gamma_0$ ,  $\gamma_1$ , and  $\gamma_2$ .** Taking the partial derivatives with respect to  $\gamma_0$ ,  $\gamma_1$  and  $\gamma_2$  and setting them to 0 yield

$$\begin{aligned}
\frac{\partial Q}{\partial \gamma_0} &= \sum_{j=1}^J 2 \mathbb{E} [r_j - \gamma_0 - \gamma_1 x_{j,1} - \gamma_2 x_{j,2}] \\
\implies \sum_{j=1}^J r_j - J\gamma_0 - \gamma_1 \sum_{j=1}^J x_{j|J,1} - \gamma_2 \sum_{j=1}^J x_{j|J,2} &= 0
\end{aligned} \tag{25}$$

$$\begin{aligned}
\frac{\partial Q}{\partial \gamma_1} &= \sum_{j=1}^J 2 \mathbb{E} [x_{j,1} (r_j - \gamma_0 - \gamma_1 x_{j,1} - \gamma_2 x_{j,2})] \\
\implies \sum_{j=1}^J r_j x_{j|J,1} - \gamma_0 \sum_{j=1}^J x_{j|J,1} - \gamma_1 \sum_{j=1}^J x_{j|J,1}^2 - \gamma_2 \sum_{j=1}^J x_{j|J,1} x_{j|J,2} &= 0
\end{aligned} \tag{26}$$

$$\begin{aligned}
\frac{\partial Q}{\partial \gamma_2} &= \sum_{j=1}^J 2 \mathbb{E} [x_{j,2} (r_j - \gamma_0 - \gamma_1 x_{j,1} - \gamma_2 x_{j,2})] \\
\implies \sum_{j=1}^J r_j x_{j|J,2} - \gamma_0 \sum_{j=1}^J x_{j|J,2} - \gamma_1 \sum_{j=1}^J x_{j|J,1} x_{j|J,2} - \gamma_2 \sum_{j=1}^J x_{j|J,2}^2 &= 0
\end{aligned} \tag{27}$$

**M-step updates for  $\sigma_v$ .** Taking the partial derivative with respect to  $\sigma_v^2$  and setting it to 0 yields

$$\begin{aligned}
\frac{\partial Q}{\partial \sigma_v^2} &= -\frac{J}{2\sigma_v^2} + \frac{1}{2\sigma_v^4} \sum_{j=1}^J \mathbb{E} [(r_j - \gamma_0 - \gamma_1 x_{j,1} - \gamma_2 x_{j,2})^2] = 0 \\
\implies \sigma_v^2 &= \frac{1}{J} \left\{ \sum_{j=1}^J r_j^2 + J\gamma_0^2 + \gamma_1^2 \sum_{j=1}^J x_{j|J,1}^2 + \gamma_2^2 \sum_{j=1}^J x_{j|J,2}^2 \right. \\
&\quad - 2\gamma_0 \sum_{j=1}^J r_j - 2 \sum_{j=1}^J r_j x_{j|J,1} - 2 \sum_{j=1}^J r_j x_{j|J,2} \\
&\quad \left. + 2\gamma_0 \sum_{j=1}^J x_{j|J,1} + 2\gamma_0 \sum_{j=1}^J x_{j|J,2} + \sum_{j=1}^J x_{j|J,1} x_{j|J,2} \right\}
\end{aligned} \tag{28}$$

**M-step updates for  $\sigma_{\epsilon,1}$  and  $\sigma_{\epsilon,2}$ .** Taking the partial derivative with respect to  $\sigma_{\epsilon,1}^2$  and  $\sigma_{\epsilon,2}^2$  and setting it to 0 yields

$$\begin{aligned} \frac{\partial Q}{\partial \sigma_{\epsilon,1}^2} &= -\frac{J}{4\sigma_{\epsilon,1}^2} + \frac{1}{2\sigma_{\epsilon,1}^4} \sum_{j=1}^J \mathbb{E}[x_{j,1} - x_{j-1,1}]^2 = 0 \\ \implies \sigma_{\epsilon,1}^2 &= \frac{2}{J} \left\{ \sum_{j=1}^J x_{j|J,1}^2 - 2 \sum_{j=1}^J x_{j|J,1} x_{j-1|J,1} \sum_{j=1}^J x_{j-1|J,1}^2 \right\} \end{aligned} \quad (29)$$

$$\begin{aligned} \frac{\partial Q}{\partial \sigma_{\epsilon,2}^2} &= -\frac{J}{4\sigma_{\epsilon,2}^2} + \frac{1}{2\sigma_{\epsilon,2}^4} \sum_{j=1}^J \mathbb{E}[x_{j,2} - x_{j-1,2}]^2 = 0 \\ \implies \sigma_{\epsilon,2}^2 &= \frac{2}{J} \left\{ \sum_{j=1}^J x_{j|J,2}^2 - 2 \sum_{j=1}^J x_{j|J,2} x_{j-1|J,2} \sum_{j=1}^J x_{j-1|J,2}^2 \right\} \end{aligned} \quad (30)$$
